# Supplementary material for: ZnFe2O4/Zeolite Nanocomposites for Sorption Extraction of Cu2+ from Aqueous Medium
Source: MDPI journal article supplement (doi:10.3390/appliedchem3040029), 2023-09-30
Supplement: s1 [file s1]

Quantachrome QuadraWin - Data Acquisition and Reduction  
for QuadraSorb SI  
©2000-09, Quantachrome Instruments. All rights reserved.  
version 5.02

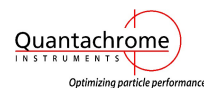

**Analysis**

Operator: Alex

Date: 6/25/2021

Sample ID: Katya

Filename:

Sample Desc: 5

Comment:

Sample weight: 0.2050 g

Analysis Time: 964.4 min

End of run:

6/25/2021 0:04:42

Instrument:

QuadraSorb Station 2

Void Vol.: He Mode. Cell: 9mm no bulb

Run mode

Standard

Outgas Time: 4.0 hrs

Outgas Temp:

100.0 C

Analysis gas: Nitrogen

Bath Temp:

77.3 K

Press. Tolerance: 0.030/0.030 (ads/des)

Equil time:

600/600 sec (ads/des)

Equil timeout:

900/900 sec (ads/des)

**Data Reduction Parameters**

|                  |                             |                       |           |                        |            |
|------------------|-----------------------------|-----------------------|-----------|------------------------|------------|
| <b>Adsorbate</b> | <b>Nitrogen</b>             | <b>Temperature</b>    | 77.350K   | <b>Liquid Density:</b> | 0.806 g/cc |
|                  | <b>Molec. Wt.:</b> 28.013 g | <b>Cross Section:</b> | 16.200 EI |                        |            |

**Analysis**  
**Operator:**Alex  
**Sample ID:** Katya

**Date:**6/25/2021  
**Filename:**

**Report**  
**Operator:**operator  
G:\QW2\_210625\_01.QPS

**Date:**7/8/2021

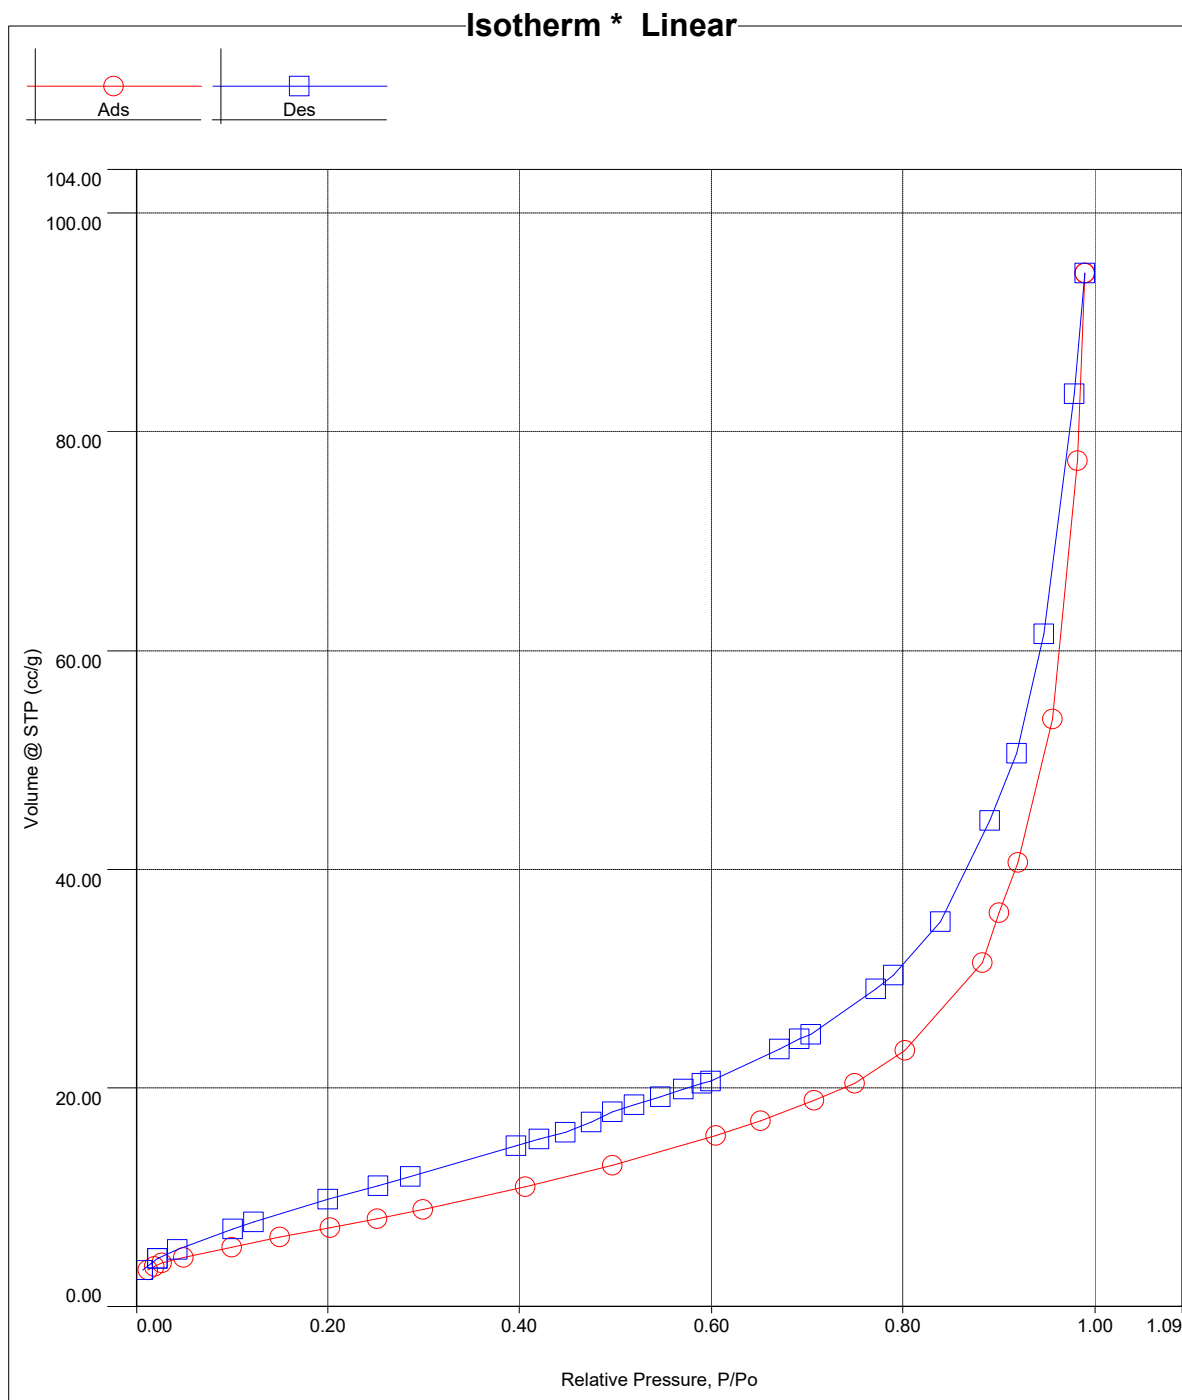

**Analysis**  
**Operator:**Alex  
**Sample ID:** Katya

**Date:**6/25/2021  
**Filename:**

**Report**  
**Operator:**operator  
**G:**QW2\_210625\_01.QPS

**Date:**7/8/2021

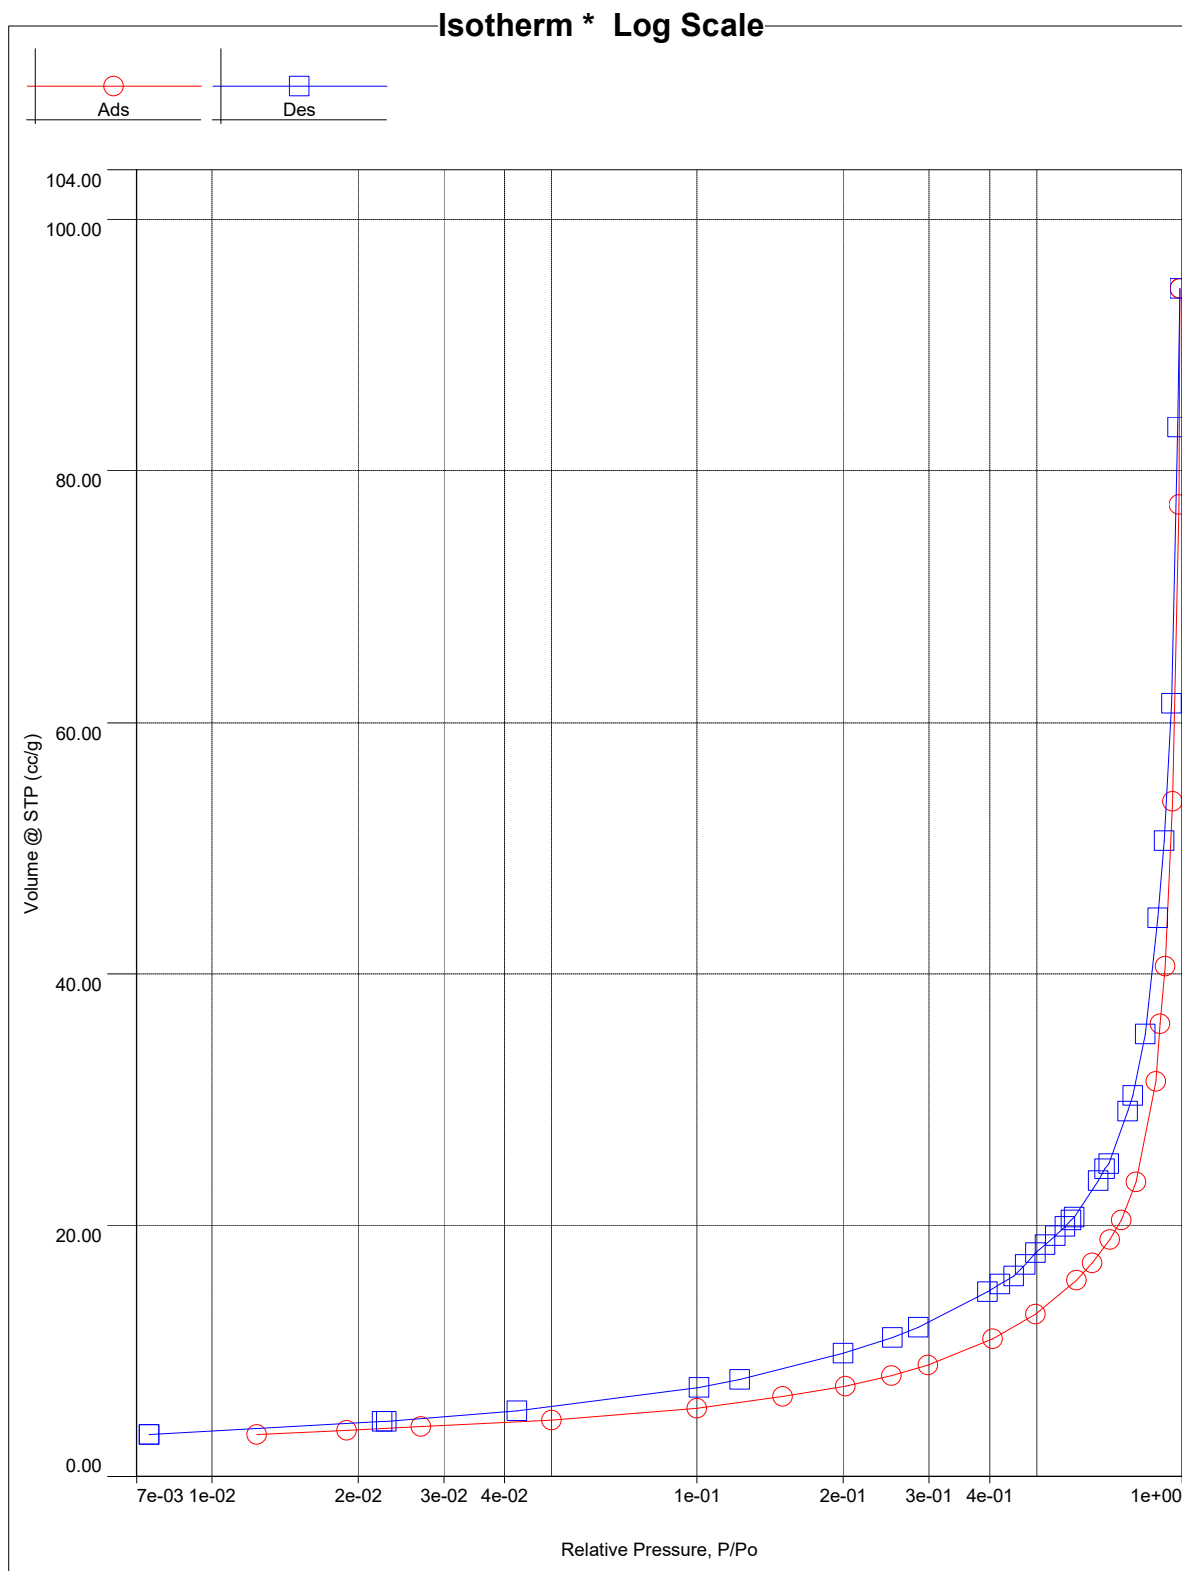

**Analysis**

Operator: Alex  
Sample ID: Katya

Date: 6/25/2021

Filename:

**Report**

Operator: operator  
G:\QW2\_210625\_01.QPS

Date: 7/8/2021

**Isotherm**

| Relative Pressure | Volume @ STP<br>[cc/g] | Relative Pressure | Volume @ STP<br>[cc/g] | Relative Pressure | Volume @ STP<br>[cc/g] |
|-------------------|------------------------|-------------------|------------------------|-------------------|------------------------|
| 1.23534e-02       | 3.3574                 | 9.00111e-01       | 36.0060                | 5.70897e-01       | 19.8961                |
| 1.89736e-02       | 3.6711                 | 9.19756e-01       | 40.5974                | 5.46502e-01       | 19.2350                |
| 2.69313e-02       | 3.9632                 | 9.55505e-01       | 53.7346                | 5.19907e-01       | 18.5002                |
| 4.99886e-02       | 4.5667                 | 9.81516e-01       | 77.3654                | 4.96821e-01       | 17.8542                |
| 9.96757e-02       | 5.5047                 | 9.89358e-01       | 94.4528                | 4.75039e-01       | 16.9367                |
| 1.50190e-01       | 6.4198                 | 9.78510e-01       | 83.4449                | 4.47750e-01       | 16.0099                |
| 2.01728e-01       | 7.2498                 | 9.47018e-01       | 61.4962                | 4.20478e-01       | 15.3310                |
| 2.51601e-01       | 8.0658                 | 9.18463e-01       | 50.6180                | 3.96720e-01       | 14.7543                |
| 2.98965e-01       | 8.8979                 | 8.89597e-01       | 44.4271                | 2.86286e-01       | 11.8931                |
| 4.05748e-01       | 10.9458                | 8.39080e-01       | 35.1753                | 2.52279e-01       | 11.0559                |
| 4.97024e-01       | 12.9334                | 7.89388e-01       | 30.3469                | 2.00198e-01       | 9.7771                 |
| 6.04537e-01       | 15.6996                | 7.71539e-01       | 29.0732                | 1.22458e-01       | 7.7176                 |
| 6.50892e-01       | 16.9913                | 7.03721e-01       | 24.9378                | 1.00619e-01       | 7.0967                 |
| 7.07124e-01       | 18.8642                | 6.91204e-01       | 24.4428                | 4.25876e-02       | 5.2527                 |
| 7.49011e-01       | 20.4803                | 6.70626e-01       | 23.5707                | 2.28042e-02       | 4.4201                 |
| 8.01706e-01       | 23.5023                | 5.99038e-01       | 20.6754                | 2.24182e-02       | 4.3975                 |
| 8.81990e-01       | 31.4755                | 5.89756e-01       | 20.4139                | 7.42687e-03       | 3.3819                 |
