# Supplementary material for: ZnFe2O4/Zeolite Nanocomposites for Sorption Extraction of Cu2+ from Aqueous Medium
Source: MDPI journal article supplement (doi:10.3390/appliedchem3040029), 2023-09-30
Supplement: s1 [file s1]

Quantachrome QuadraWin - Data Acquisition and Reduction  
for QuadraSorb SI  
©2000-09, Quantachrome Instruments. All rights reserved.  
version 5.02

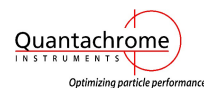

**Analysis**

Operator: Alex

Date: 7/6/2021

Sample ID: Katya

Filename:

Sample Desc: 9

Comment:

Sample weight: 0.1310 g

Analysis Time: 852.9 min

End of run:

7/6/2021 22:01:37

Instrument:

QuadraSorb Station 1

Void Vol.: He Mode. Cell: 9mm no bulb

Run mode

Standard

Outgas Time: 3.0 hrs

Outgas Temp:

100.0 C

Analysis gas: Nitrogen

Bath Temp:

77.3 K

Press. Tolerance: 0.030/0.030 (ads/des)

Equil time:

600/600 sec (ads/des)

Equil timeout:

900/900 sec (ads/des)

**Data Reduction Parameters**

|                  |                             |                       |           |                        |            |
|------------------|-----------------------------|-----------------------|-----------|------------------------|------------|
| <b>Adsorbate</b> | <b>Nitrogen</b>             | <b>Temperature</b>    | 77.350K   | <b>Liquid Density:</b> | 0.806 g/cc |
|                  | <b>Molec. Wt.:</b> 28.013 g | <b>Cross Section:</b> | 16.200 EI |                        |            |

**Analysis**  
**Operator:**Alex  
**Sample ID:** Katya

**Date:**7/6/2021  
**Filename:**

**Report**  
**Operator:**operator  
**G:**QW1\_210707\_02.QPS

**Date:**7/8/2021

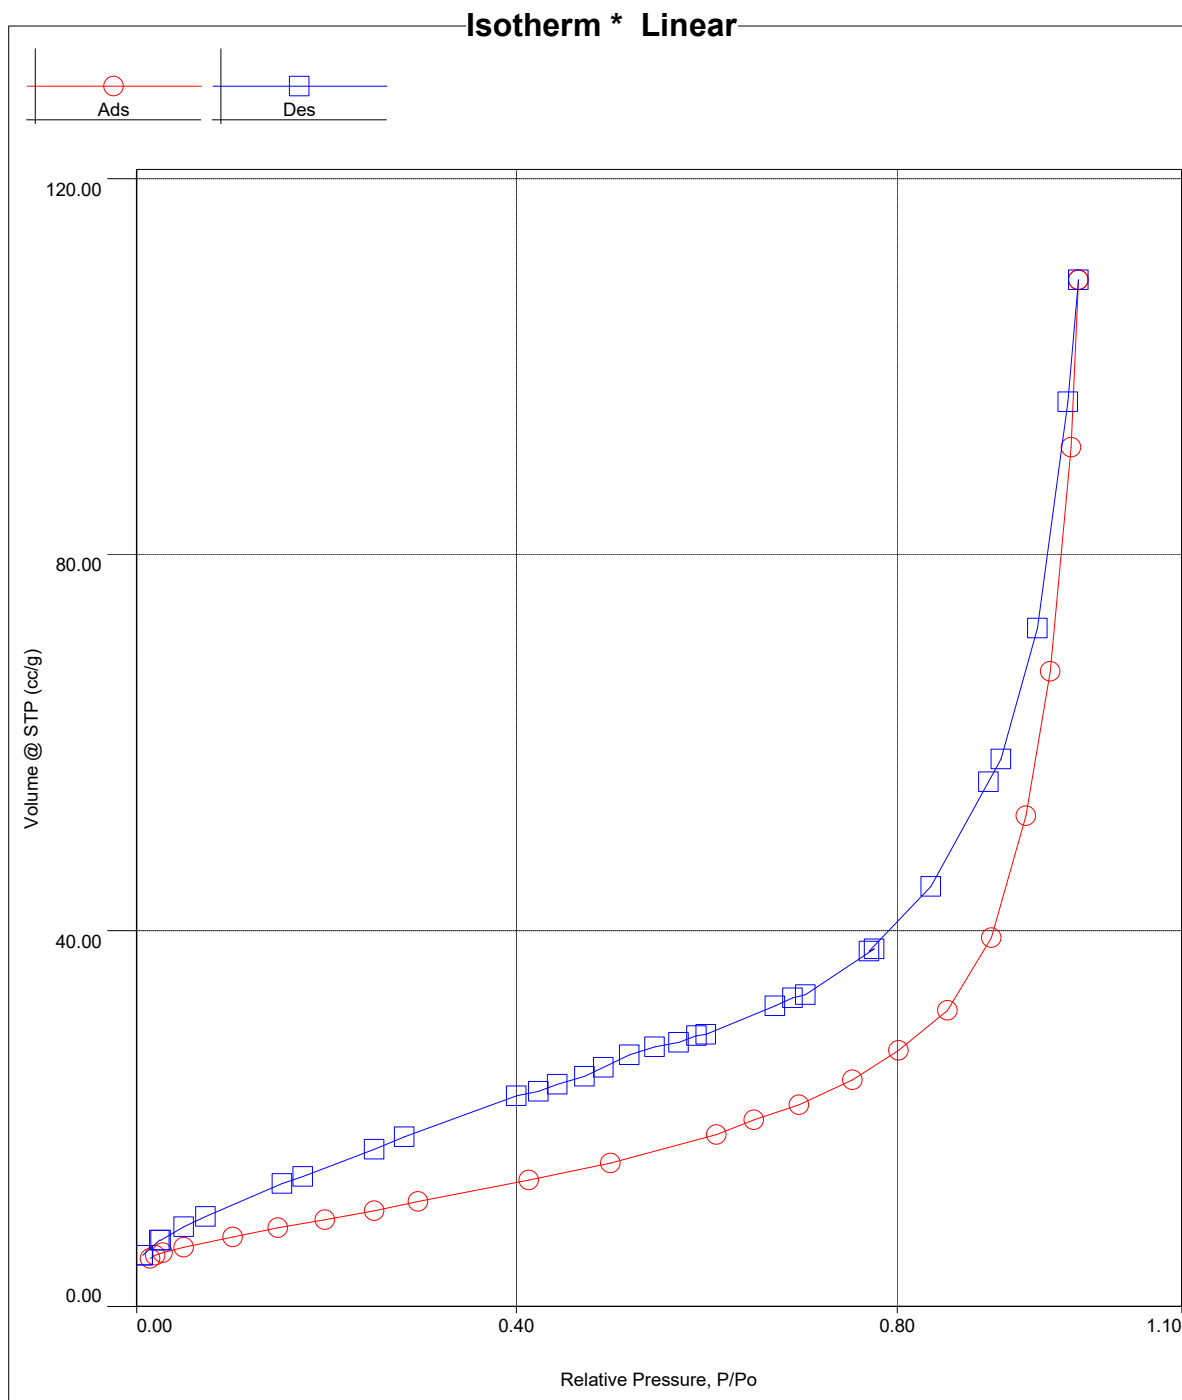

**Analysis**  
**Operator:**Alex  
**Sample ID:** Katya

**Date:**7/6/2021  
**Filename:**

**Report**  
**Operator:**operator  
**G:**QW1\_210707\_02.QPS

**Date:**7/8/2021

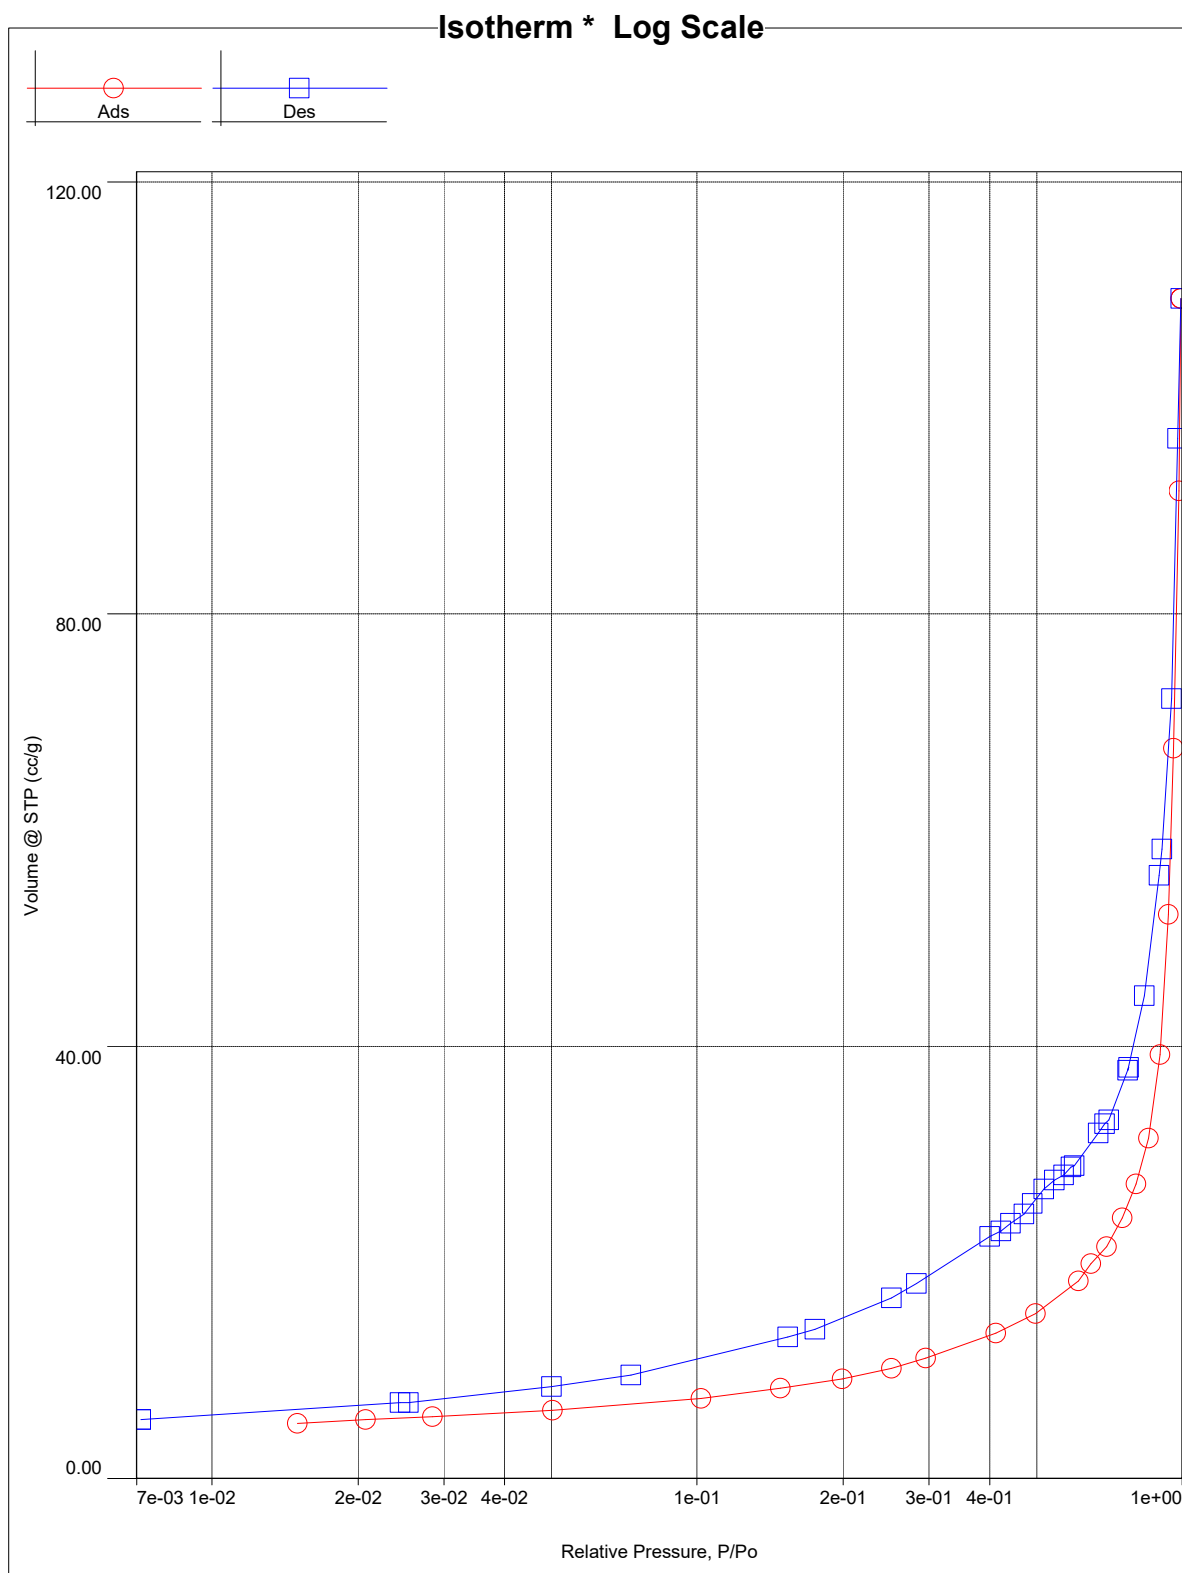

**Analysis**

Operator: Alex  
Sample ID: Katya

Date: 7/6/2021  
Filename:

**Report**

Operator: operator  
G:\QW1\_210707\_02.QPS

Date: 7/8/2021

**Isotherm**

| Relative Pressure | Volume @ STP<br>[cc/g] | Relative Pressure | Volume @ STP<br>[cc/g] | Relative Pressure | Volume @ STP<br>[cc/g] |
|-------------------|------------------------|-------------------|------------------------|-------------------|------------------------|
| 1.49829e-02       | 5.1871                 | 8.99075e-01       | 39.2525                | 5.70146e-01       | 28.1358                |
| 2.07485e-02       | 5.4663                 | 9.35331e-01       | 52.1761                | 5.44996e-01       | 27.6243                |
| 2.83950e-02       | 5.7546                 | 9.61039e-01       | 67.6205                | 5.18348e-01       | 26.8139                |
| 5.04091e-02       | 6.4020                 | 9.83031e-01       | 91.4275                | 4.91494e-01       | 25.5058                |
| 1.01823e-01       | 7.4913                 | 9.90966e-01       | 109.2469               | 4.71205e-01       | 24.5194                |
| 1.48717e-01       | 8.3607                 | 9.79441e-01       | 96.2673                | 4.42315e-01       | 23.6721                |
| 1.98865e-01       | 9.2890                 | 9.47242e-01       | 72.1746                | 4.22525e-01       | 22.9791                |
| 2.50643e-01       | 10.2683                | 9.09180e-01       | 58.3218                | 3.99777e-01       | 22.4173                |
| 2.96144e-01       | 11.2391                | 8.96242e-01       | 55.8639                | 2.82527e-01       | 18.0304                |
| 4.13272e-01       | 13.4869                | 8.35073e-01       | 44.6710                | 2.50543e-01       | 16.8190                |
| 4.98532e-01       | 15.3239                | 7.70599e-01       | 37.7540                | 1.74996e-01       | 13.9108                |
| 6.09785e-01       | 18.3221                | 7.76174e-01       | 38.0447                | 1.53421e-01       | 13.1583                |
| 6.49356e-01       | 19.9115                | 7.03656e-01       | 33.2310                | 7.28913e-02       | 9.6120                 |
| 6.97126e-01       | 21.5224                | 6.90341e-01       | 32.8379                | 5.01855e-02       | 8.4932                 |
| 7.52848e-01       | 24.1501                | 6.71134e-01       | 32.0591                | 2.53400e-02       | 7.0888                 |
| 8.01887e-01       | 27.2357                | 5.98895e-01       | 28.9552                | 2.43669e-02       | 7.0203                 |
| 8.52679e-01       | 31.5206                | 5.88947e-01       | 28.8314                | 7.12039e-03       | 5.5152                 |
