# Supplementary material for: ZnFe2O4/Zeolite Nanocomposites for Sorption Extraction of Cu2+ from Aqueous Medium
Source: MDPI journal article supplement (doi:10.3390/appliedchem3040029), 2023-09-30
Supplement: s1 [file s1]

Quantachrome QuadraWin - Data Acquisition and Reduction  
for QuadraSorb SI  
©2000-09, Quantachrome Instruments. All rights reserved.  
version 5.02

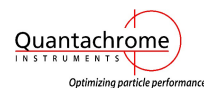

**Analysis**

Operator: Alex  
Sample ID: Katya

Date: 6/30/2021

Filename:  
Comment:

**Report**

Operator: operator  
G:\QW2\_210701\_01.QPS

Date: 7/8/2021

Sample Desc: 6  
Sample weight: 0.1800 g

Analysis Time: 815.6 min

Void Vol.: He Mode. Cell: 9mm no bulb

Outgas Time: 3.0 hrs

Analysis gas: Nitrogen

Press. Tolerance: 0.030/0.030 (ads/des)

End of run:

Run mode:

Outgas Temp:

Bath Temp:

Equil time:

6/30/2021 22:38:38

Standard

100.0 C

77.3 K

600/600 sec (ads/des)

Instrument:

QuadraSorb Station 2

Equil timeout:

900/900 sec (ads/des)

**Data Reduction Parameters**

|                  |                             |                       |           |                        |            |
|------------------|-----------------------------|-----------------------|-----------|------------------------|------------|
| <b>Adsorbate</b> | <b>Nitrogen</b>             | <b>Temperature</b>    | 77.350K   | <b>Liquid Density:</b> | 0.806 g/cc |
|                  | <b>Molec. Wt.:</b> 28.013 g | <b>Cross Section:</b> | 16.200 EI |                        |            |

**Analysis**  
**Operator:**Alex  
**Sample ID:** Katya

**Date:**6/30/2021  
**Filename:**

**Report**  
**Operator:**operator  
**G:**QW2\_210701\_01.QPS

**Date:**7/8/2021

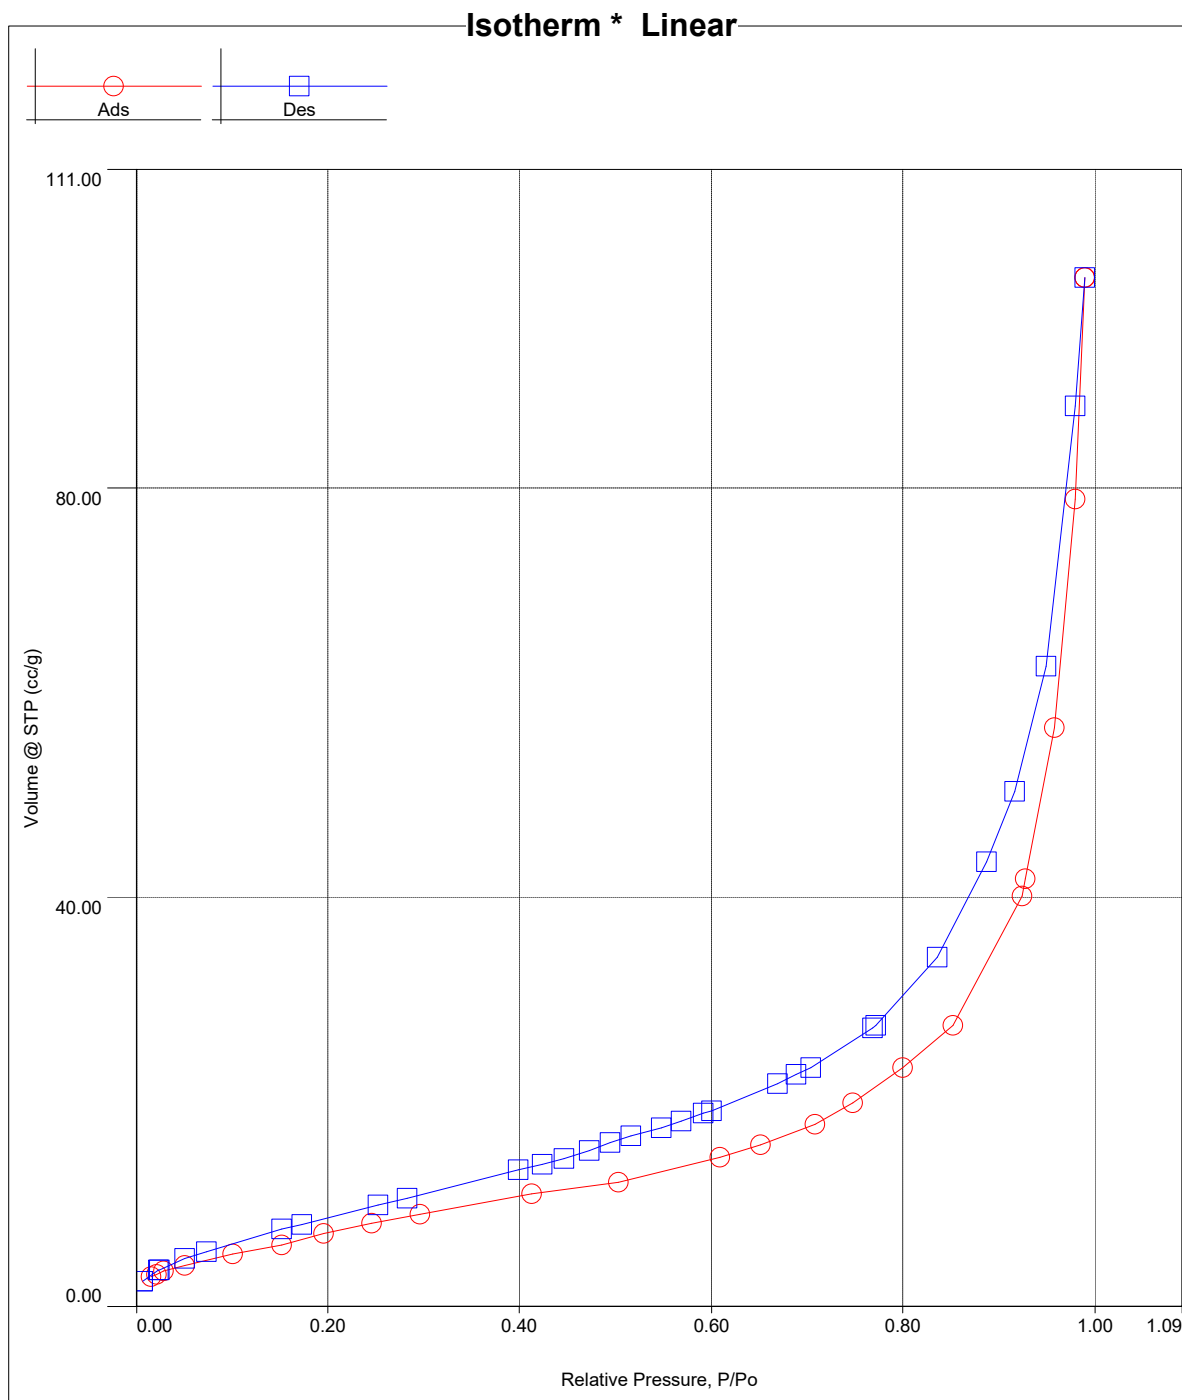

**Analysis**  
**Operator:**Alex  
**Sample ID:** Katya

**Date:**6/30/2021  
**Filename:**

**Report**  
**Operator:**operator  
**G:**\\QW2\_210701\_01.QPS

**Date:**7/8/2021

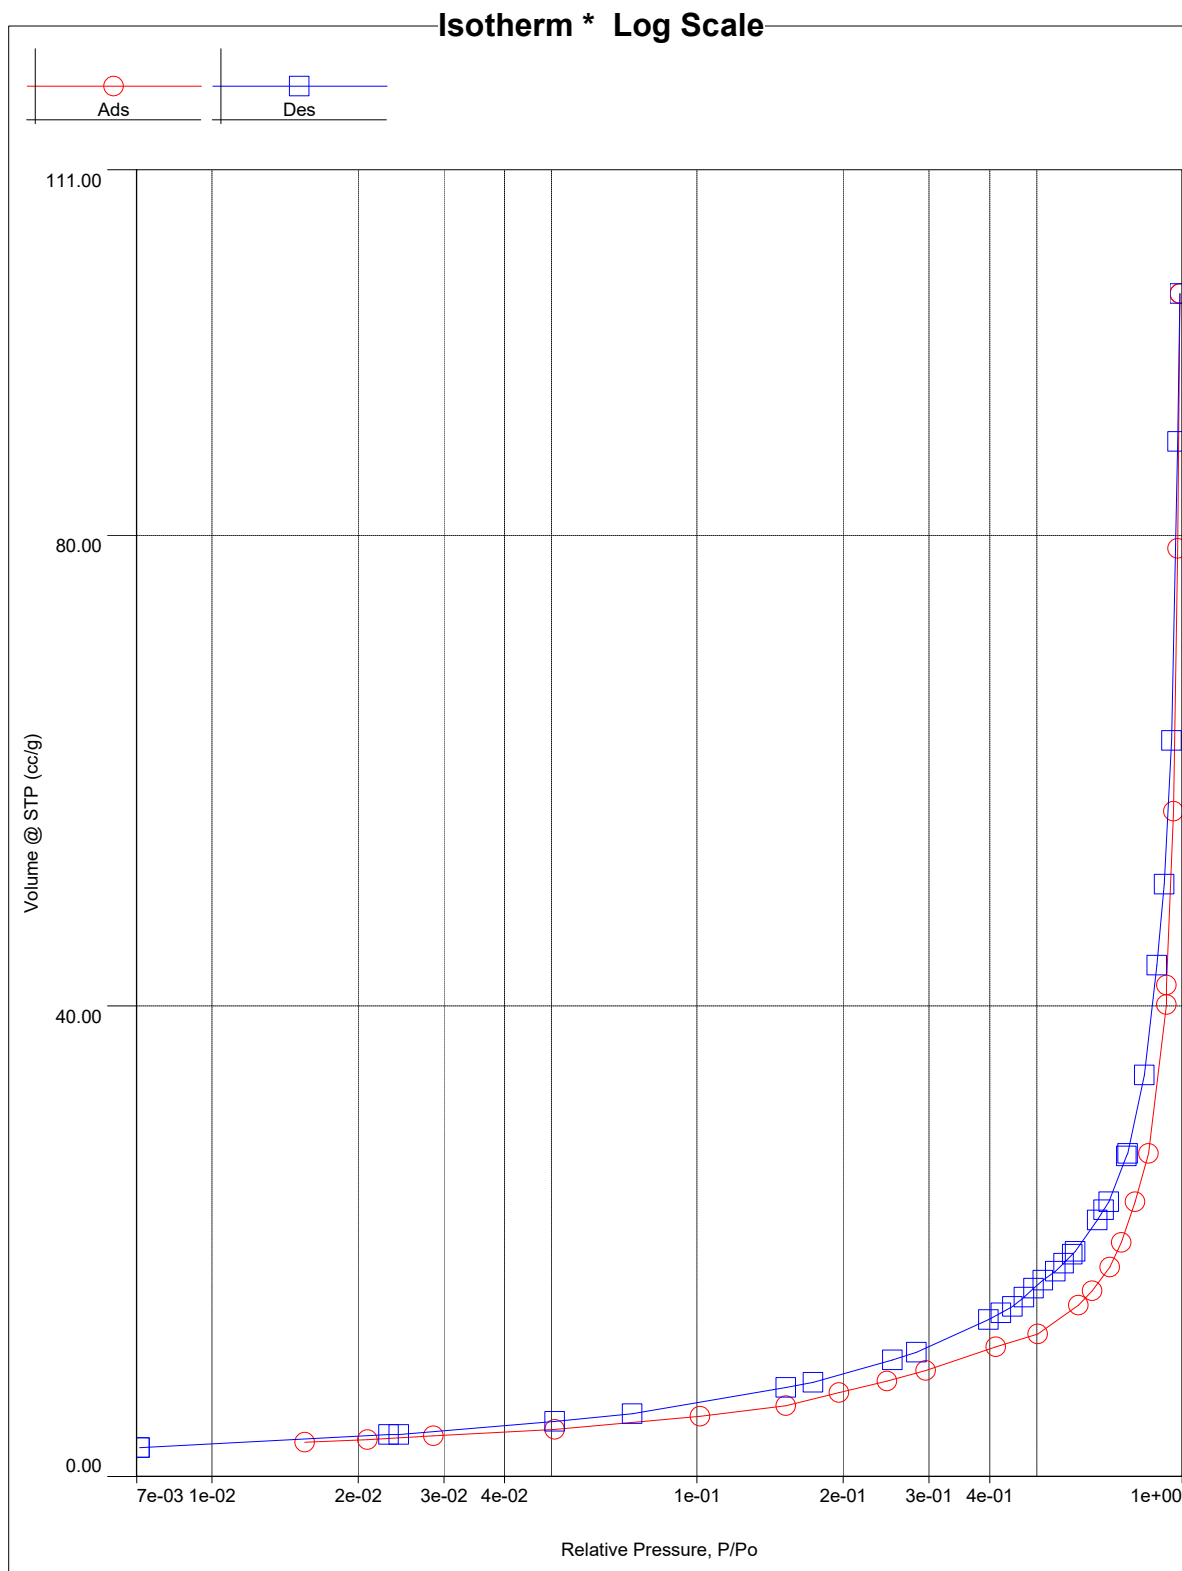

**Analysis**

Operator: Alex  
Sample ID: Katya

Date: 6/30/2021  
Filename:

**Report**

Operator: operator  
G:\QW2\_210701\_01.QPS

Date: 7/8/2021

**Isotherm**

| Relative Pressure | Volume @ STP<br>[cc/g] | Relative Pressure | Volume @ STP<br>[cc/g] | Relative Pressure | Volume @ STP<br>[cc/g] |
|-------------------|------------------------|-------------------|------------------------|-------------------|------------------------|
| 1.55540e-02       | 2.9699                 | 9.23806e-01       | 40.1645                | 5.68098e-01       | 18.1693                |
| 2.08987e-02       | 3.1987                 | 9.27097e-01       | 41.7768                | 5.47832e-01       | 17.5289                |
| 2.86097e-02       | 3.4695                 | 9.57880e-01       | 56.5904                | 5.16067e-01       | 16.6857                |
| 5.08374e-02       | 4.0710                 | 9.79386e-01       | 78.8251                | 4.94042e-01       | 16.0384                |
| 1.01288e-01       | 5.1234                 | 9.89366e-01       | 100.4567               | 4.72141e-01       | 15.2104                |
| 1.52401e-01       | 6.0960                 | 9.79323e-01       | 87.9795                | 4.46437e-01       | 14.4764                |
| 1.95906e-01       | 7.1227                 | 9.49357e-01       | 62.5983                | 4.23566e-01       | 13.9591                |
| 2.46243e-01       | 8.1395                 | 9.16462e-01       | 50.3283                | 3.98109e-01       | 13.4242                |
| 2.95931e-01       | 9.0899                 | 8.86873e-01       | 43.4957                | 2.83323e-01       | 10.6443                |
| 4.12805e-01       | 11.0074                | 8.35524e-01       | 34.1510                | 2.52859e-01       | 9.9824                 |
| 5.02491e-01       | 12.1538                | 7.71015e-01       | 27.5090                | 1.72698e-01       | 8.0346                 |
| 6.09074e-01       | 14.6259                | 7.67640e-01       | 27.2566                | 1.51785e-01       | 7.5626                 |
| 6.51467e-01       | 15.8126                | 7.03078e-01       | 23.3228                | 7.32368e-02       | 5.3961                 |
| 7.07639e-01       | 17.8281                | 6.88750e-01       | 22.6548                | 5.09078e-02       | 4.6979                 |
| 7.47202e-01       | 19.9739                | 6.68171e-01       | 21.7688                | 2.42924e-02       | 3.6566                 |
| 7.99518e-01       | 23.3802                | 6.00183e-01       | 19.1463                | 2.31090e-02       | 3.6009                 |
| 8.51617e-01       | 27.4716                | 5.91147e-01       | 18.9265                | 7.09654e-03       | 2.5409                 |
