# Supplementary material for: ZnFe2O4/Zeolite Nanocomposites for Sorption Extraction of Cu2+ from Aqueous Medium
Source: MDPI journal article supplement (doi:10.3390/appliedchem3040029), 2023-09-30
Supplement: s1 [file s1]

## SUPPLEMENTARY MATERIALS

### S1. SEM images of the samples (JEOL-6510L microscope)

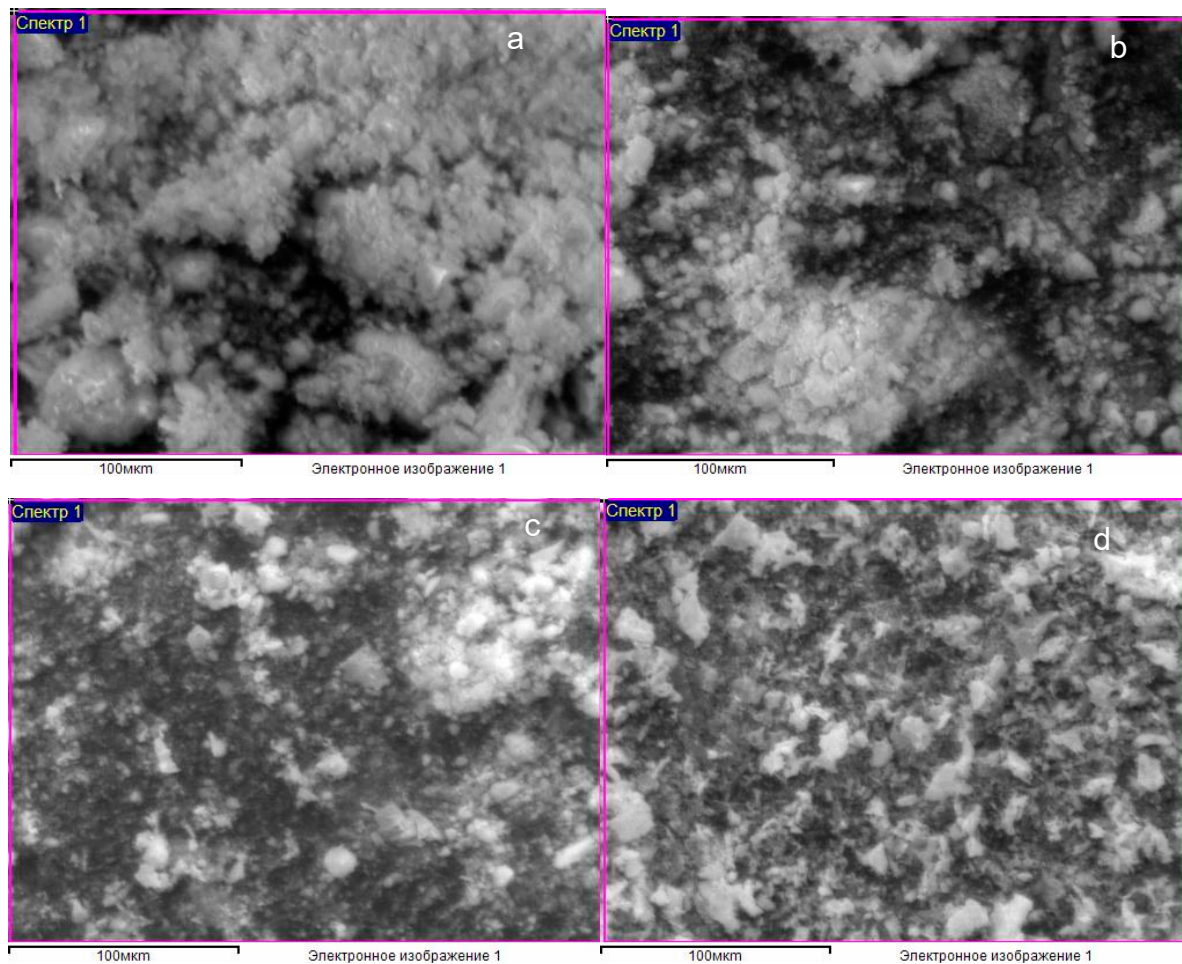

Figure S1. SEM-images of zeolite (a), composite Zt-2F (b), composite Zt-16F (c) and zinc ferrite (d)

**S2.** Elemental mapping of the samples (scanning electron microscope JSM-6380LV (JEOL, Japan) with an energy dispersive microanalysis system INCA 250)

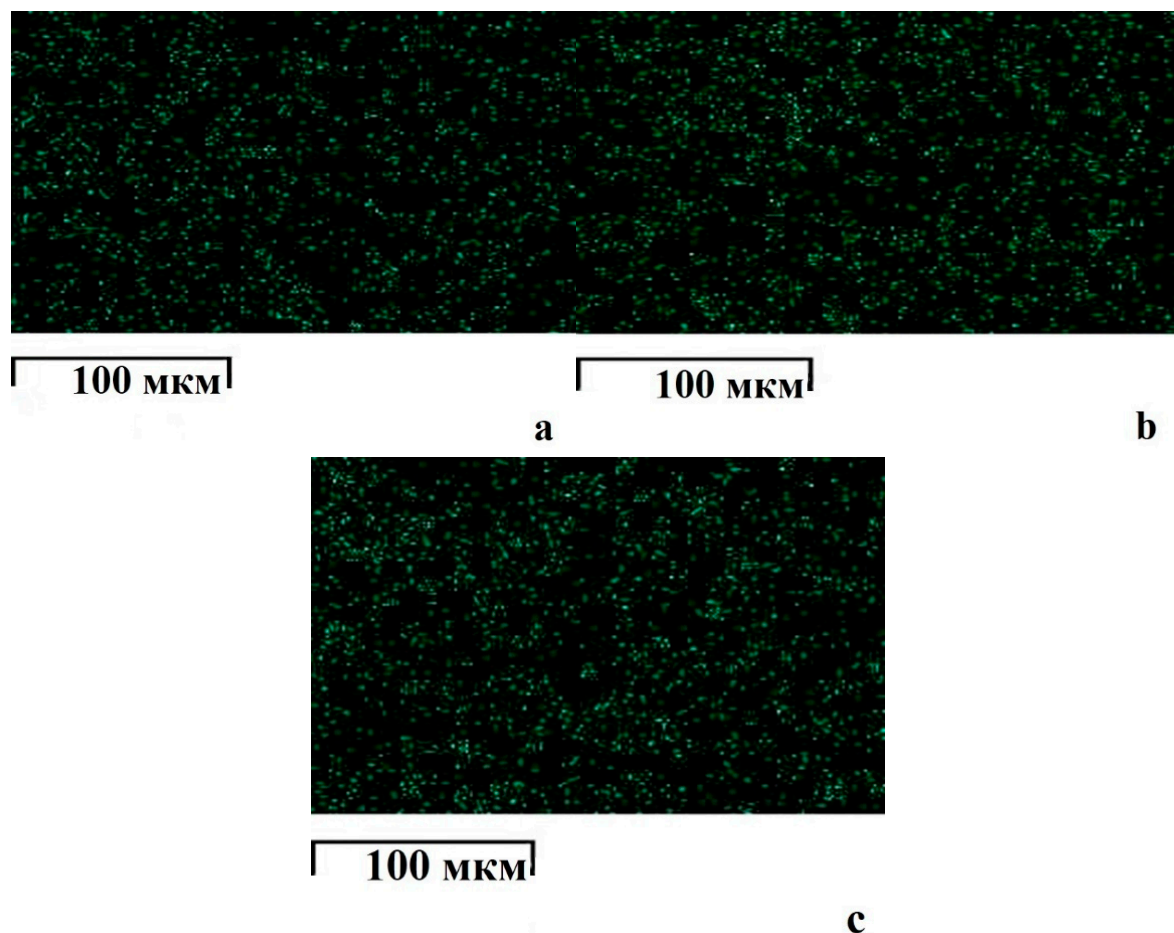

Figure S2. EDX elemental mapping of copper after adsorption of  $\text{Cu}^{2+}$  from solution at the surface of investigated samples: a - Zt-Cu; b – Zt-16F-Cu; c – F-Cu

**S3.** pH of aqueous solutions of  $\text{CuSO}_4$

Table S1. pH of aqueous solutions of  $\text{CuSO}_4$  at  $t=20^\circ\text{C}$

| Concentration,<br>$C_N$ , mole-<br>eqv/L | pH              | $C_{H^+}$ , mole/L   | Rate of<br>hydrolysis,<br>h, % |
|------------------------------------------|-----------------|----------------------|--------------------------------|
| 0.0025                                   | $5.34 \pm 0.08$ | $4.6 \cdot 10^{-6}$  | 0.37                           |
| 0.005                                    | $5.36 \pm 0.07$ | $4.4 \cdot 10^{-6}$  | 0.18                           |
| 0.01                                     | $5.19 \pm 0.23$ | $6.45 \cdot 10^{-6}$ | 0.13                           |
| 0.025                                    | $4.86 \pm 0.11$ | $1.38 \cdot 10^{-5}$ | 0.11                           |
| 0.05                                     | $4.68 \pm 0.05$ | $2.1 \cdot 10^{-5}$  | 0.08                           |

|       |           |                       |      |
|-------|-----------|-----------------------|------|
| 0.075 | 4.43±0.20 | 3.7*10 <sup>-5</sup>  | 0.10 |
| 0.1   | 4.38±0.23 | 4.17*10 <sup>-5</sup> | 0.08 |

Considering hydrolysis reactions in aqueous solutions of CuSO<sub>4</sub>. pH values of solutions were controlled to assess degree of hydrolysis (Table S1):

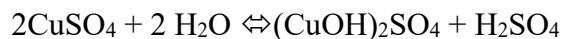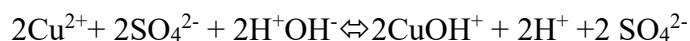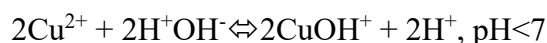

Degree of hydrolysis was calculated by expression:

$$h = \frac{C_{\text{H}^+}}{C_{\text{salt}}} \cdot 100\% .$$

where  $C_{\text{H}^+}$  and  $C_{\text{salt}}$  – molar concentrations of  $\text{H}^+$  and salt in solution respectively (mole/L).

As follows from Table S1, degree of hydrolysis of copper sulfate did not exceed 0.4 %, hence, the major part of dissolved salts was represented by hydrated  $\text{Cu}^{2+}$  ions which were the main ions being sorbed.

#### S4. Desorption of $\text{Cu}^{2+}$ from sample of $\text{ZnFe}_2\text{O}_4$ by various electrolyte solutions

Table S2. Desorption of  $\text{Cu}^{2+}$  from  $\text{ZnFe}_2\text{O}_4$  sample by various electrolyte solutions

| Sample                   | $\text{Cu}^{2+}$ amount desorbed, $Q_{\text{des}}$ , mg/g |            |           | $\text{Cu}^{2+}$ adsorbed from 0.01N $\text{CuSO}_4$ , $a(\text{Cu})$ , mg/g | Degree of desorption by 0,1 N HCl, $Q_{\text{des}}/a(\text{Cu})$ |
|--------------------------|-----------------------------------------------------------|------------|-----------|------------------------------------------------------------------------------|------------------------------------------------------------------|
|                          | 0,1 N NaCl                                                | 0,1 N NaOH | 0,1 N HCl |                                                                              |                                                                  |
| F                        | 0                                                         | 0          | 66.81     | 67.07                                                                        | 99.6 %                                                           |
| Zt                       | n.a.                                                      | n.a.       | 12.36     | 16.17                                                                        | 76.4                                                             |
| Zt-8F<br>(after 5 cycle) | n.a.                                                      | n.a.       | 5.1       | 11.28<br>(at 5 cycle)                                                        | 45.2                                                             |
