# Supplementary material for: ZnFe2O4/Zeolite Nanocomposites for Sorption Extraction of Cu2+ from Aqueous Medium
Source: MDPI journal article supplement (doi:10.3390/appliedchem3040029), 2023-09-30
Supplement: s1 [file s1]

Quantachrome QuadraWin - Data Acquisition and Reduction  
for QuadraSorb SI  
©2000-09, Quantachrome Instruments. All rights reserved.  
version 5.02

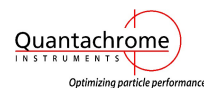

**Analysis**

Operator: Alex

Date: 7/7/2021

Sample ID: Katya

Filename:

Sample Desc: 8

Comment:

Sample weight: 0.1990 g

Analysis Time: 825.8 min

End of run:

7/7/2021 21:16:07

Instrument:

QuadraSorb Station 2

Void Vol.: He Mode. Cell: 9mm large bulb

Run mode

Standard

Outgas Time: 3.0 hrs

Outgas Temp:

100.0 C

Analysis gas: Nitrogen

Bath Temp:

77.3 K

Press. Tolerance: 0.030/0.030 (ads/des)

Equil time:

600/600 sec (ads/des)

Equil timeout:

900/900 sec (ads/des)

**Data Reduction Parameters**

|                  |                             |                       |           |                        |            |
|------------------|-----------------------------|-----------------------|-----------|------------------------|------------|
| <b>Adsorbate</b> | <b>Nitrogen</b>             | <b>Temperature</b>    | 77.350K   | <b>Liquid Density:</b> | 0.806 g/cc |
|                  | <b>Molec. Wt.:</b> 28.013 g | <b>Cross Section:</b> | 16.200 EI |                        |            |

**Analysis**  
**Operator:**Alex  
**Sample ID:** Katya

**Date:**7/7/2021  
**Filename:**

**Report**  
**Operator:**operator  
**G:**QW2\_210708\_01.QPS

**Date:**7/9/2021

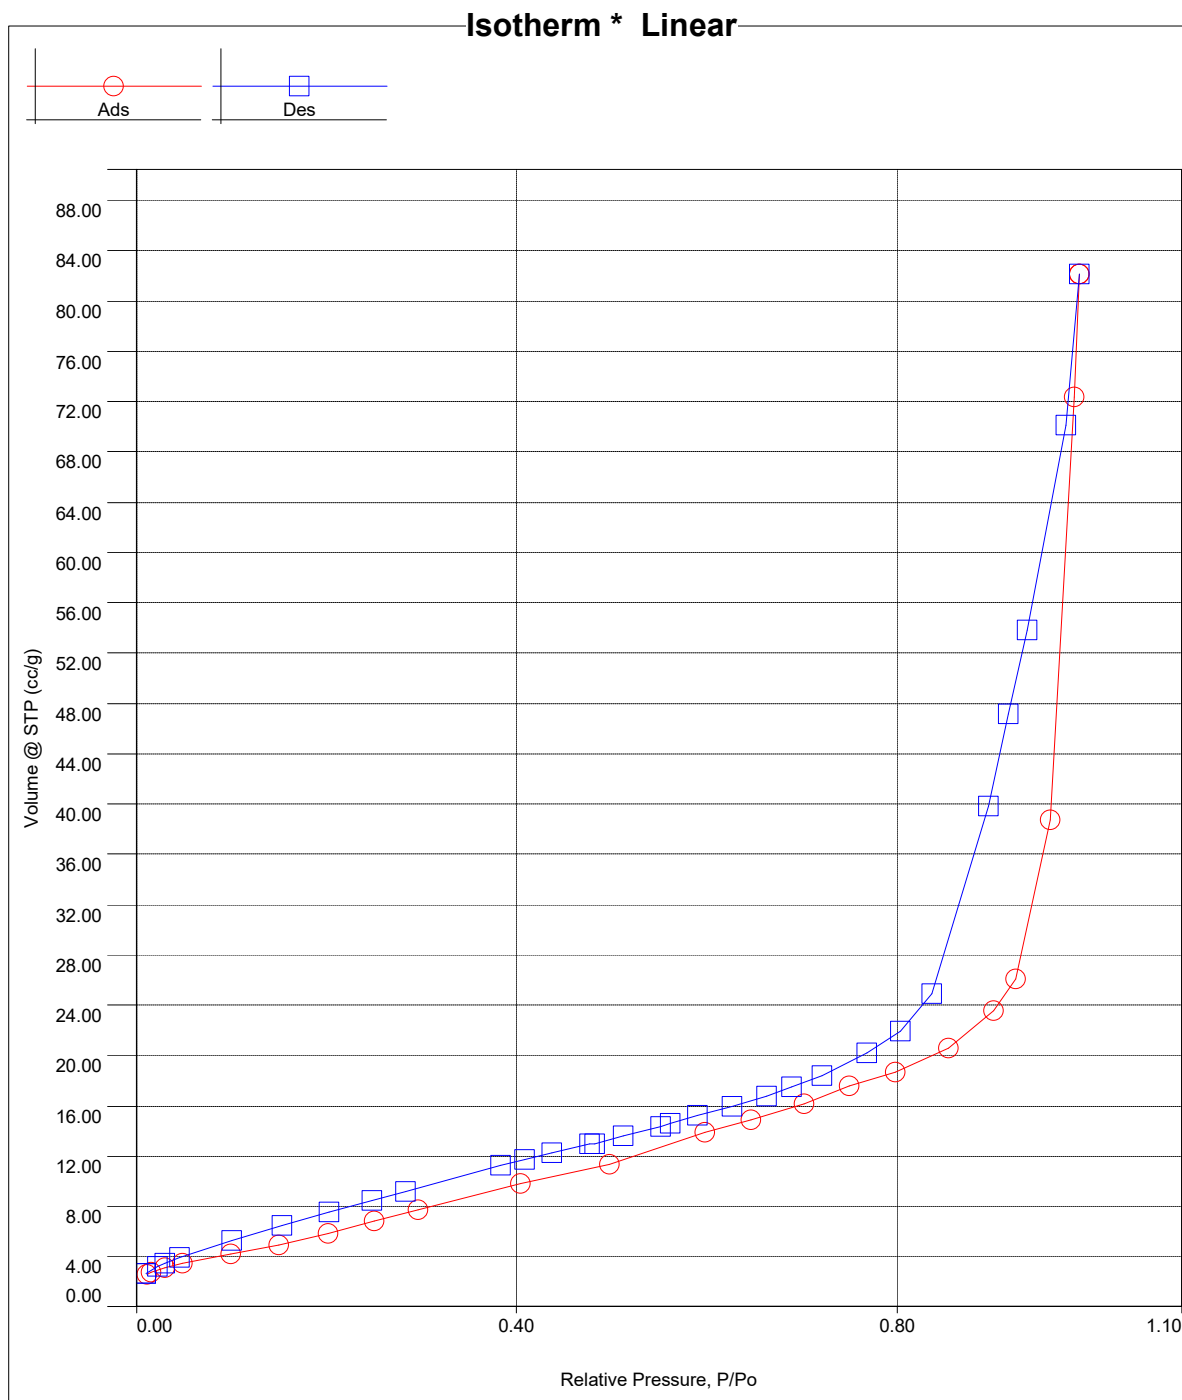

**Analysis**  
**Operator:**Alex  
**Sample ID:** Katya

**Date:**7/7/2021  
**Filename:**

**Report**  
**Operator:**operator  
**G:\QW2\_210708\_01.QPS**

**Date:**7/9/2021

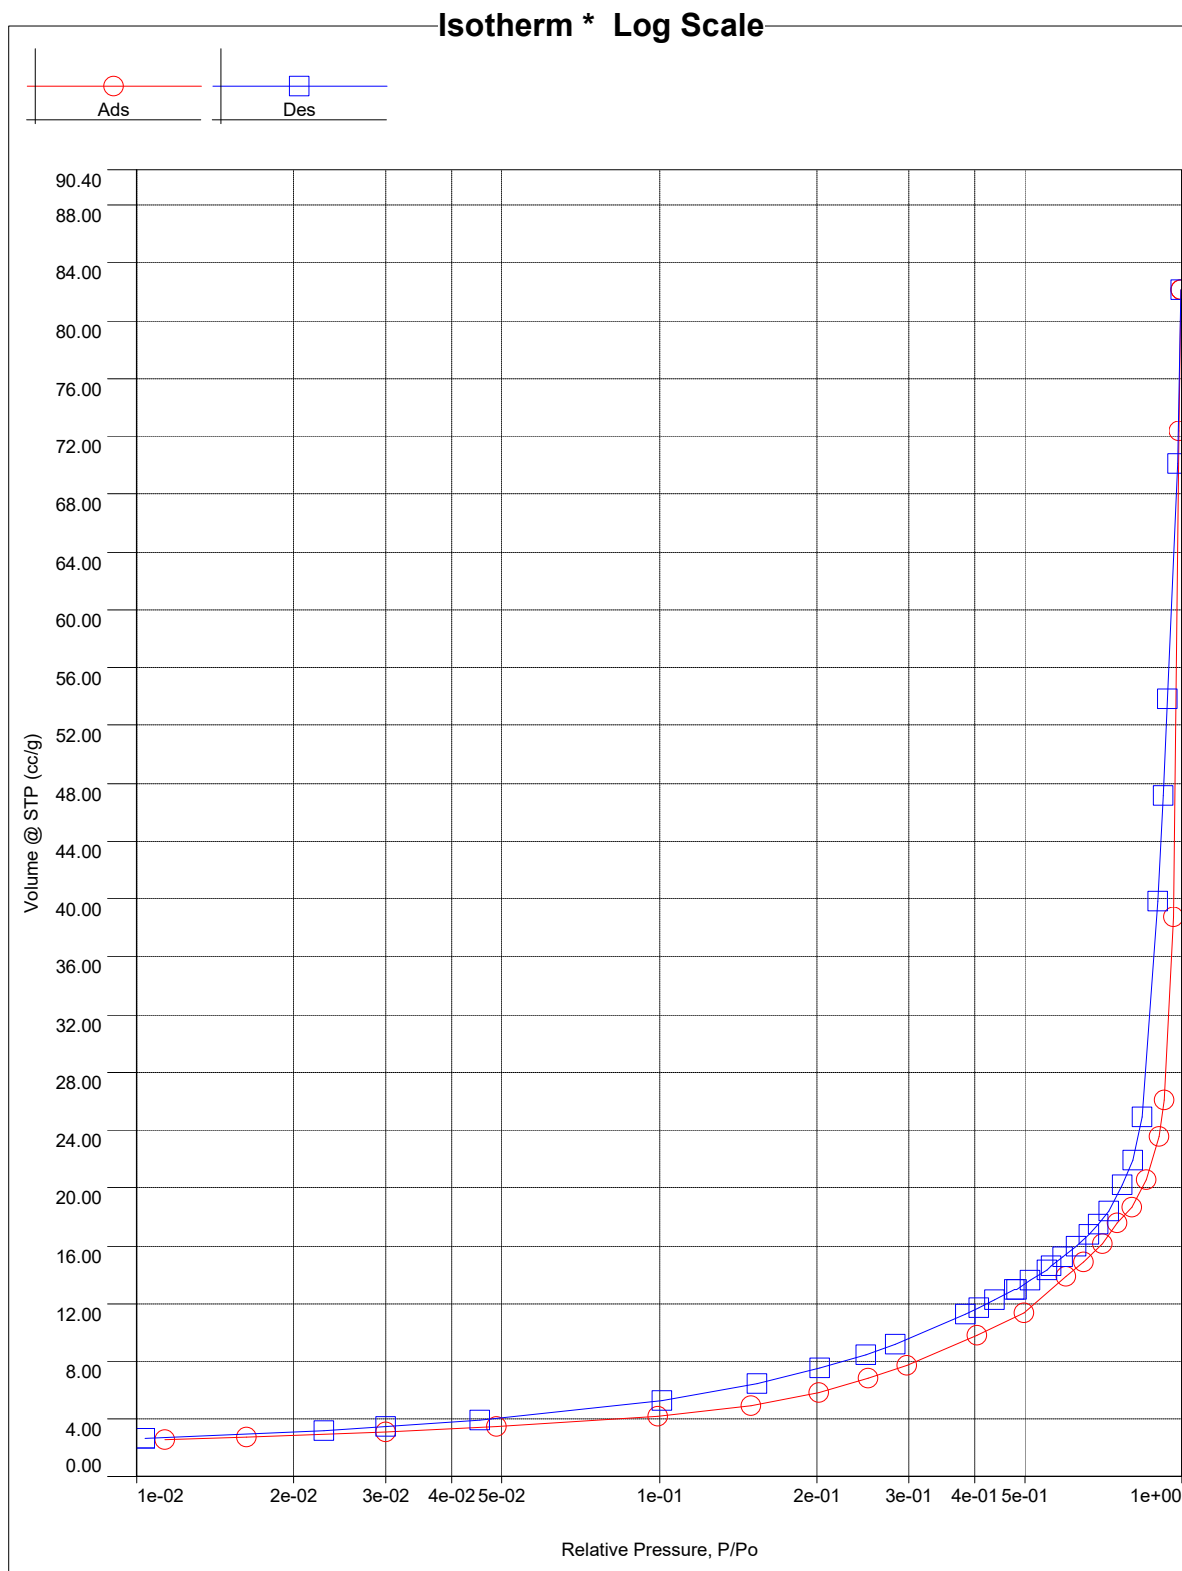

**Analysis**

Operator: Alex  
Sample ID: Katya

Date: 7/7/2021  
Filename:

**Report**

Operator: operator  
G:\QW2\_210708\_01.QPS

Date: 7/9/2021

**Isotherm**

| Relative Pressure | Volume @ STP<br>[cc/g] | Relative Pressure | Volume @ STP<br>[cc/g] | Relative Pressure | Volume @ STP<br>[cc/g] |
|-------------------|------------------------|-------------------|------------------------|-------------------|------------------------|
| 1.13267e-02       | 2.5618                 | 9.01790e-01       | 23.5784                | 5.62075e-01       | 14.6042                |
| 1.62444e-02       | 2.7402                 | 9.24178e-01       | 26.0798                | 5.51748e-01       | 14.3307                |
| 2.99389e-02       | 3.0857                 | 9.60331e-01       | 38.7513                | 5.11761e-01       | 13.6149                |
| 4.89094e-02       | 3.4434                 | 9.86180e-01       | 72.3591                | 4.82022e-01       | 13.0128                |
| 9.94811e-02       | 4.1892                 | 9.91239e-01       | 82.1661                | 4.77160e-01       | 12.9904                |
| 1.49782e-01       | 4.9331                 | 9.77531e-01       | 70.1283                | 4.37667e-01       | 12.2234                |
| 2.01568e-01       | 5.8342                 | 9.36437e-01       | 53.8230                | 4.08349e-01       | 11.6921                |
| 2.50760e-01       | 6.8565                 | 9.16636e-01       | 47.1279                | 3.83749e-01       | 11.2674                |
| 2.96823e-01       | 7.6859                 | 8.96222e-01       | 39.8664                | 2.82804e-01       | 9.1870                 |
| 4.03983e-01       | 9.7670                 | 8.36791e-01       | 24.9009                | 2.48190e-01       | 8.4588                 |
| 4.98056e-01       | 11.3734                | 8.03045e-01       | 21.8974                | 2.02663e-01       | 7.5746                 |
| 5.98145e-01       | 13.8651                | 7.67848e-01       | 20.2251                | 1.53566e-01       | 6.4864                 |
| 6.46117e-01       | 14.8556                | 7.21508e-01       | 18.4169                | 1.01004e-01       | 5.2774                 |
| 7.02828e-01       | 16.1722                | 6.89402e-01       | 17.4573                | 4.54681e-02       | 3.8996                 |
| 7.49563e-01       | 17.5407                | 6.63030e-01       | 16.7831                | 2.99799e-02       | 3.4449                 |
| 7.98402e-01       | 18.6674                | 6.26360e-01       | 15.9716                | 2.28857e-02       | 3.2005                 |
| 8.54431e-01       | 20.5490                | 5.90633e-01       | 15.1983                | 1.04190e-02       | 2.6436                 |
