# Supplementary material for: ZnFe2O4/Zeolite Nanocomposites for Sorption Extraction of Cu2+ from Aqueous Medium
Source: MDPI journal article supplement (doi:10.3390/appliedchem3040029), 2023-09-30
Supplement: s1 [file s1]

Quantachrome QuadraWin - Data Acquisition and Reduction  
for QuadraSorb SI  
©2000-09, Quantachrome Instruments. All rights reserved.  
version 5.02

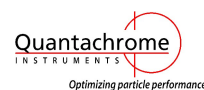

**Analysis**

Operator: Alex

Date: 7/2/2021

Sample ID: Katya

Filename:

Sample Desc: 7

Comment:

Sample weight: 0.1420 g

Analysis Time: 818.9 min

End of run: 7/2/2021 0:10:19

Instrument: QuadraSorb Station 2

Void Vol.: He Mode. Cell: 9mm no bulb

Run mode: Standard

Outgas Time: 3.0 hrs

Outgas Temp: 100.0 C

Analysis gas: Nitrogen

Bath Temp: 77.3 K

Press. Tolerance: 0.030/0.030 (ads/des)

Equil time: 600/600 sec (ads/des)

Equil timeout: 900/900 sec (ads/des)

**Data Reduction Parameters**

|                  |                      |                       |           |                        |            |
|------------------|----------------------|-----------------------|-----------|------------------------|------------|
| <b>Adsorbate</b> | Nitrogen             | <b>Temperature</b>    | 77.350K   | <b>Liquid Density:</b> | 0.806 g/cc |
|                  | Molec. Wt.: 28.013 g | <b>Cross Section:</b> | 16.200 EI |                        |            |

**Analysis**  
**Operator:**Alex  
**Sample ID:** Katya

**Date:**7/2/2021  
**Filename:**

**Report**  
**Operator:**operator  
**G:**\\QW2\_210702\_01.QPS

**Date:**7/8/2021

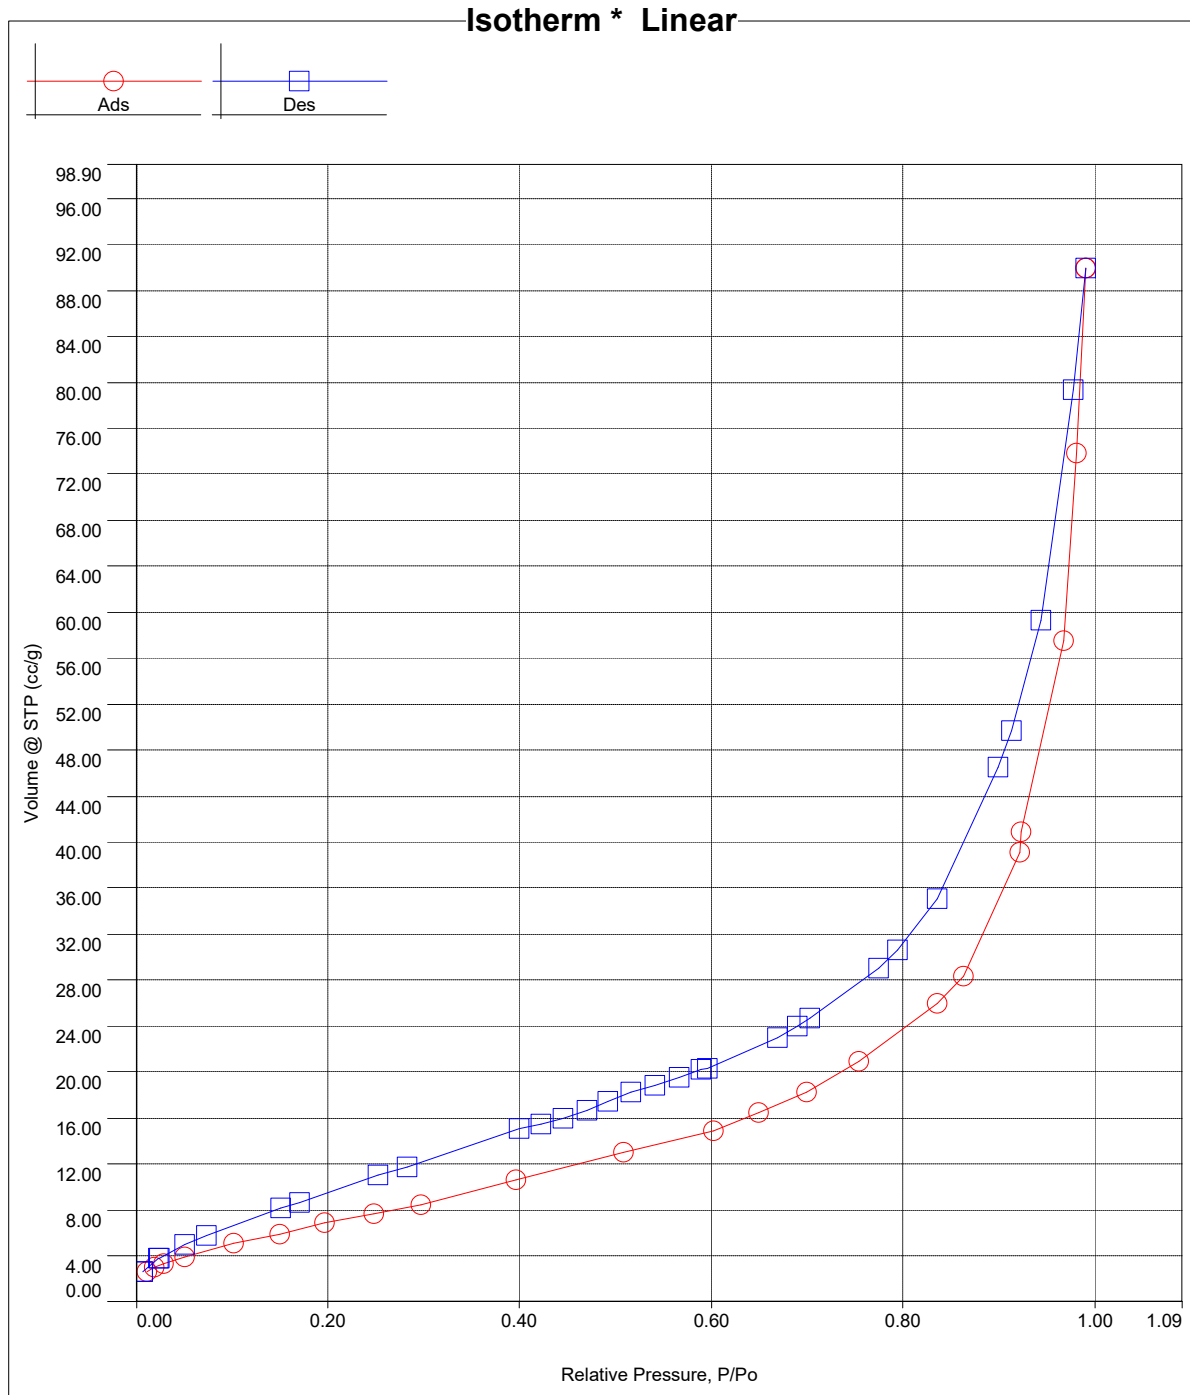

**Analysis**  
**Operator:**Alex  
**Sample ID:** Katya

**Date:**7/2/2021  
**Filename:**

**Report**  
**Operator:**operator  
**G:**QW2\_210702\_01.QPS

**Date:**7/8/2021

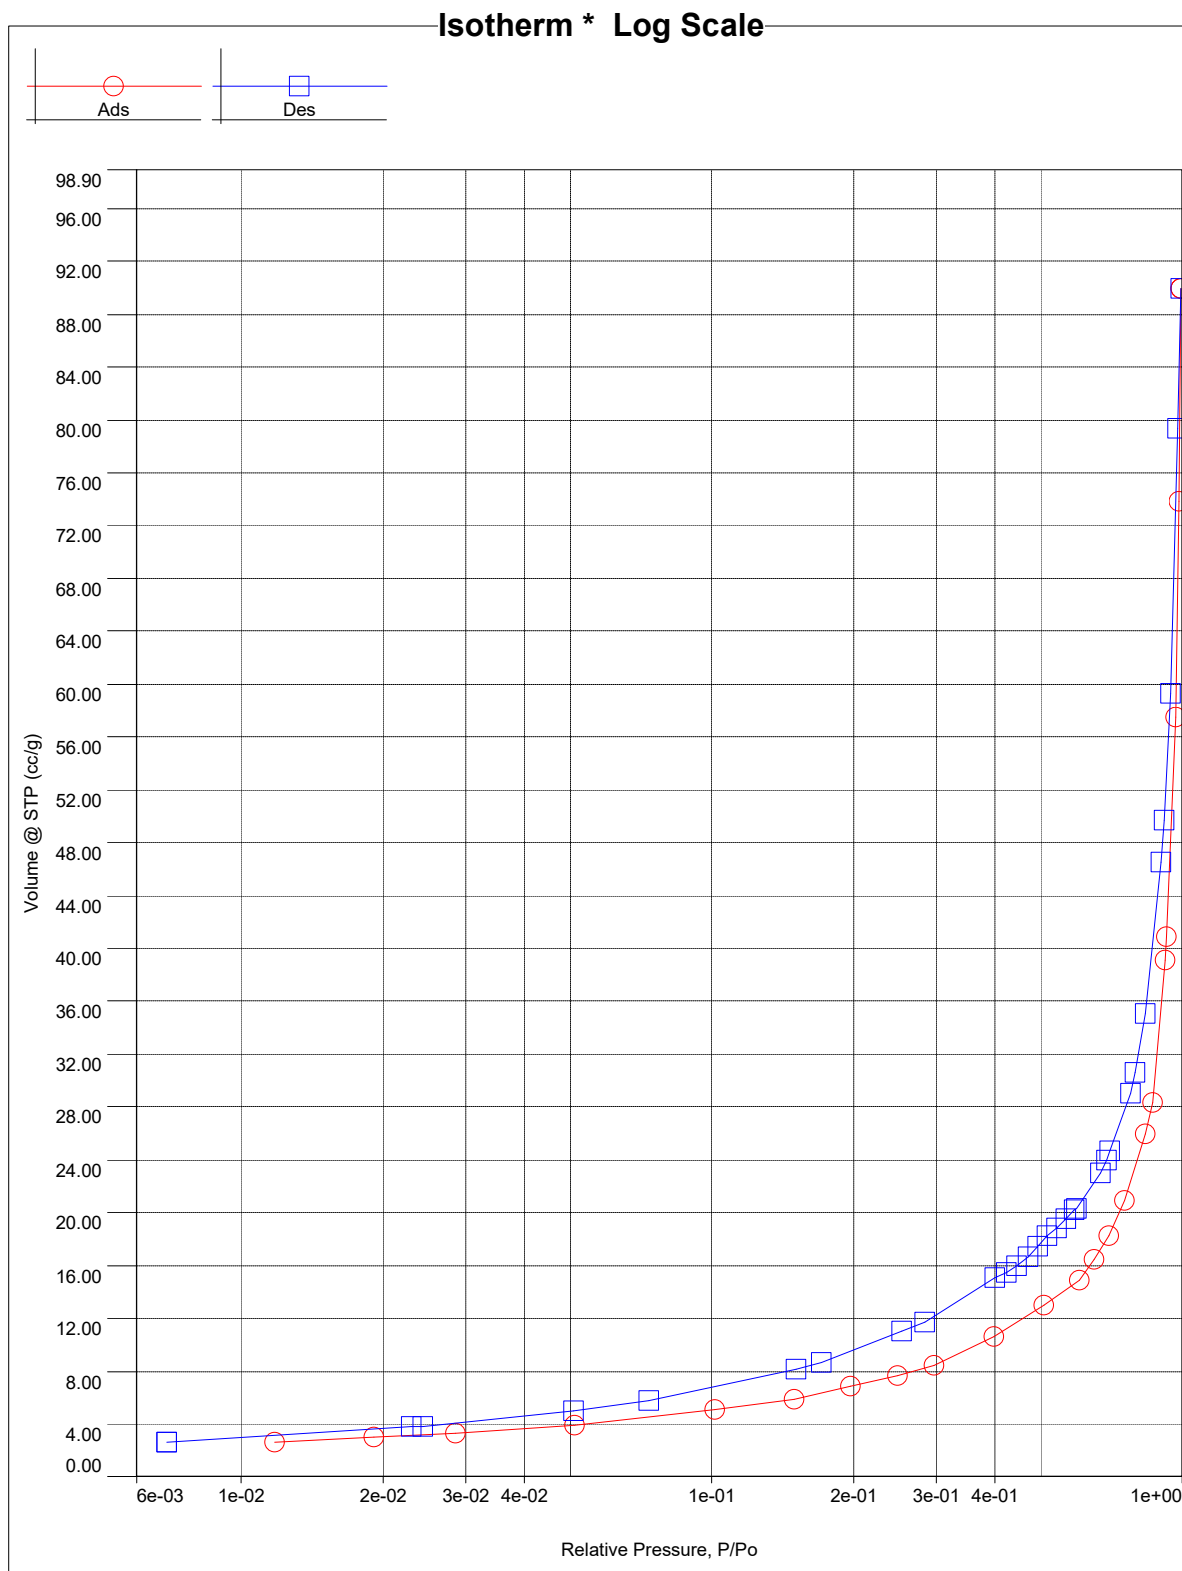

**Analysis**

Operator: Alex  
Sample ID: Katya

Date: 7/2/2021  
Filename:

**Report**

Operator: operator  
G:\QW2\_210702\_01.QPS

Date: 7/8/2021

**Isotherm**

| Relative Pressure | Volume @ STP<br>[cc/g] | Relative Pressure | Volume @ STP<br>[cc/g] | Relative Pressure | Volume @ STP<br>[cc/g] |
|-------------------|------------------------|-------------------|------------------------|-------------------|------------------------|
| 1.17805e-02       | 2.6152                 | 9.21311e-01       | 39.1079                | 5.66345e-01       | 19.5080                |
| 1.91123e-02       | 2.9794                 | 9.22774e-01       | 40.8492                | 5.40910e-01       | 18.8207                |
| 2.85105e-02       | 3.3265                 | 9.66847e-01       | 57.4753                | 5.15936e-01       | 18.2195                |
| 5.11392e-02       | 3.9297                 | 9.80710e-01       | 73.8010                | 4.91729e-01       | 17.4975                |
| 1.01435e-01       | 5.0637                 | 9.90730e-01       | 89.9045                | 4.69812e-01       | 16.6679                |
| 1.49585e-01       | 5.8662                 | 9.76711e-01       | 79.3810                | 4.44913e-01       | 16.0130                |
| 1.96667e-01       | 6.8556                 | 9.43629e-01       | 59.2988                | 4.22490e-01       | 15.4929                |
| 2.47912e-01       | 7.6475                 | 9.12930e-01       | 49.7050                | 3.99064e-01       | 15.1075                |
| 2.97002e-01       | 8.5025                 | 8.99214e-01       | 46.5096                | 2.83221e-01       | 11.7581                |
| 3.96684e-01       | 10.6258                | 8.35805e-01       | 35.0291                | 2.52779e-01       | 10.9812                |
| 5.08834e-01       | 13.0030                | 7.93895e-01       | 30.6015                | 1.70753e-01       | 8.7025                 |
| 6.02616e-01       | 14.9023                | 7.74488e-01       | 29.0763                | 1.51327e-01       | 8.1663                 |
| 6.49202e-01       | 16.4553                | 7.02471e-01       | 24.6442                | 7.35612e-02       | 5.7553                 |
| 6.98816e-01       | 18.2801                | 6.89117e-01       | 23.9852                | 5.07208e-02       | 4.9576                 |
| 7.53561e-01       | 20.9490                | 6.68264e-01       | 23.0382                | 2.42953e-02       | 3.8264                 |
| 8.35701e-01       | 25.9163                | 5.95619e-01       | 20.2778                | 2.30192e-02       | 3.7597                 |
| 8.62242e-01       | 28.3289                | 5.89400e-01       | 20.2010                | 6.92902e-03       | 2.6349                 |
